# Supplementary material for: Hybridization of graphene sheets and carbon-coated Fe3O4 nanoparticles as a synergistic adsorbent of organic dyes
Source: Royal Society of Chemistry journal article supplement (doi:10.1039/c2jm35609k), 2012-01-01
Supplement: c2jm35609k.pdf [file c2jm35609k.pdf]

Supplementary information (ESI) for Journal of Materials Chemistry  
This journal is © The Royal Society of Chemistry 2010

## Hybridization of graphene sheets and carbon-coated Fe<sub>3</sub>O<sub>4</sub> nanoparticles as synergistic adsorbent of organic dyes †

Wei Fan,<sup>a</sup> Wei Gao,<sup>a</sup> Chao Zhang,<sup>a</sup> Weng Weei Tjiu,<sup>b</sup> Jisheng Pan<sup>b</sup> and Tianxi  
Liu<sup>\*a</sup>

### Electronic Supplementary Information

**Figure S1.** TEM images of Fe<sub>3</sub>O<sub>4</sub>@carbon sample.

**Figure S2.** TEM images of GFC190 hybrids prepared with different concentrations of graphene/Fe<sub>3</sub>O<sub>4</sub> hybrids in glucose solution. (a) 1.25 mg/mL; (b) 5 mg/mL.

**Figure S3.** TGA curves of GO, SSG, Fe<sub>3</sub>O<sub>4</sub>, graphene/Fe<sub>3</sub>O<sub>4</sub> and GFC190 hybrids. The experiments were performed under air flow from 100 to 800°C at a heating rate of 10°C/min.

**Figure S4.** N<sub>2</sub> adsorption/desorption isotherms of GFC10, GFC100, GFC190 and GFC380 hybrids.

Supplementary information (ESI) for Journal of Materials Chemistry  
This journal is © The Royal Society of Chemistry 2010

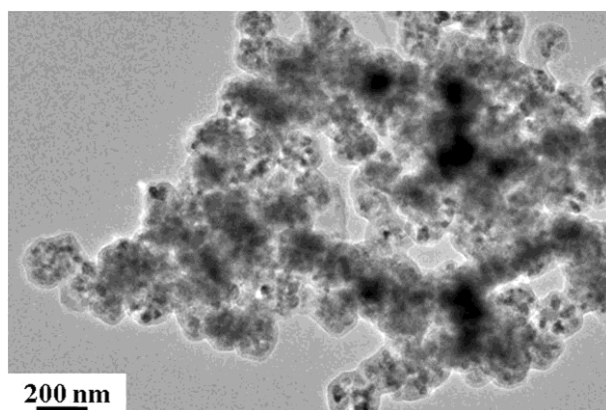

**Figure S1**

Supplementary information (ESI) for Journal of Materials Chemistry  
This journal is © The Royal Society of Chemistry 2010

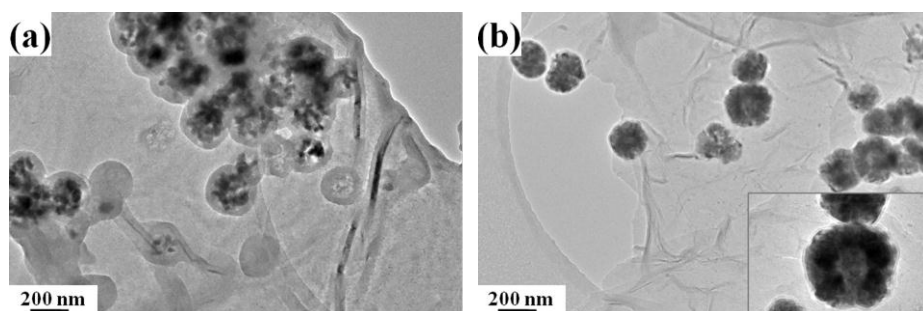

**Figure S2**

Supplementary information (ESI) for Journal of Materials Chemistry  
This journal is © The Royal Society of Chemistry 2010

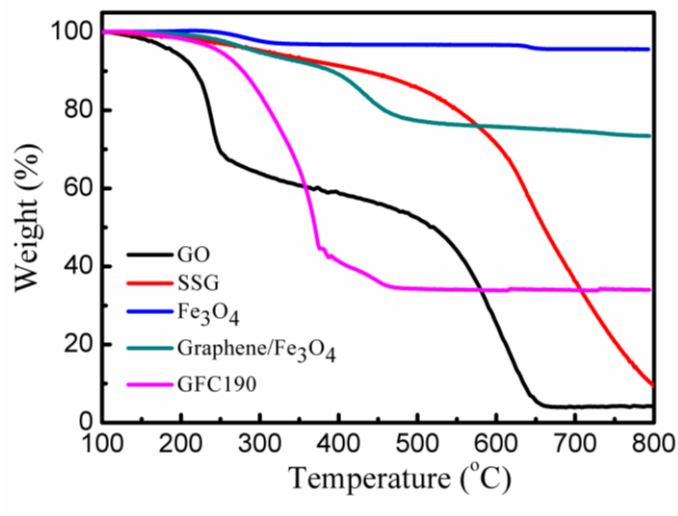

Figure S3

Supplementary information (ESI) for Journal of Materials Chemistry  
This journal is © The Royal Society of Chemistry 2010

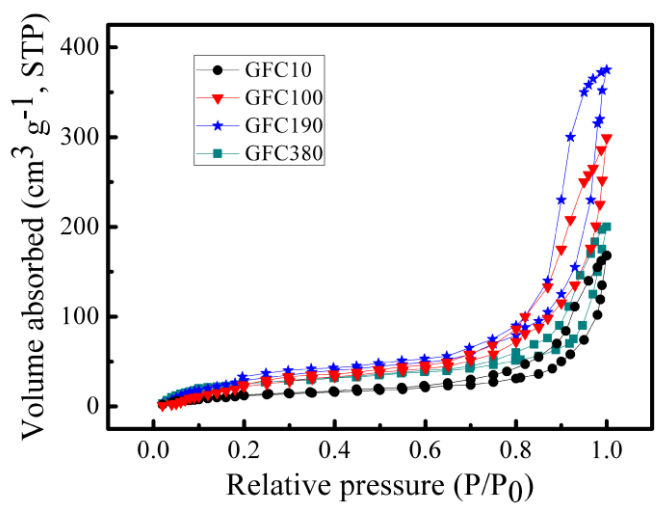

Figure S4
